# Supplementary material for: A Conserved Long Intergenic Non-coding RNA Containing snoRNA Sequences, lncCOBRA1, Affects Arabidopsis Germination and Development
Source: Front Plant Sci. 2022 May 25;13:906603. doi: 10.3389/fpls.2022.906603 (PMC9175010; doi:10.3389/fpls.2022.906603)
Supplement: Supplementary file 3 [file Table_3.XLSX]

## Sheet: Supplemental_data_set_3
geneName	a_harvest	b_0hr	c_1hr_dark	d_12hr_dark	e_48hr_dark	f_1hr_light	g_6hr_light	h_12hr_light	i_24hr_light	j_48hr_light
AT1G05913	1	1.51426	3.01668	2.07922	62.0402	96.9578	27.6184	7.60773	4.14326	0.798647
AT3G00980	1	2.10611	2.51646	6.76773	44.3813	56.4326	36.7828	10.4916	2.2286	0.609139
AT3G03435	1	2.11977	6.02412	3.2612	46.4818	63.2303	33.5163	6.73998	1.99055	0.978107
AT3G04775	1	1.48606	2.94647	1.98577	13.1762	30.2596	21.2809	4.44406	1.56385	0.94759
AT3G05655	1	3.67964	7.77253	3.25317	139.783	176.377	213.178	44.4837	9.61544	1.66351
AT3G09105	1	1.06186	2.59728	1.57934	6.57905	11.2005	7.98325	3.68179	0.936784	0.309515
AT4G03905	1	3.51839	2.70309	1.38898	54.3798	74.7176	67.2419	12.4057	3.72122	1.35805
AT4G04565	1	3.4569	1.84138	1.25581	6.1957	8.68931	5.98856	3.21088	0.836493	1.60664
AT4G13575	1	1.6672	3.93296	2.04704	68.2755	52.9487	34.9432	15.6302	3.3052	5.98424
AT4G06235	1	0.794708	0.493457	1.62001	8.08828	9.70007	5.02552	4.37302	1.17924	0.759101
AT4G07070	1	3.75875	8.1594	2.36856	104.257	154.792	178.668	33.6746	20.8852	3.13772
AT5G02645	1	3.26858	2.25868	5.66417	40.3961	43.6966	22.1526	4.32088	1.34236	0.350264
AT5G07325	1	2.28113	1.86146	1.74522	5.12972	5.88433	3.22035	1.72667	0.906308	0.634503
AT5G07745	1	2.48605	2.23661	1.9363	4.38831	4.85626	1.82065	0.847768	0.313675	0.212156
